# Supplementary material for: Tomsquarryite, NaMgAl3(PO4)2(OH)6 ● 8H2O, a new crandallite-derivative mineral from Tom's phosphate quarry, Kapunda, South Australia
Source: Copernicus journal article supplement (doi:10.5194/ejm-34-375-2022), 2022-08-17
Supplement: Supplementary file 1 [file ejm-34-375-2022-supplement.zip]

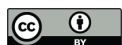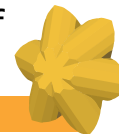

*Supplement of*

**Tomsquarryite,  $\text{NaMgAl}_3(\text{PO}_4)_2(\text{OH})_6 \cdot 8\text{H}_2\text{O}$ , a new crandallite-derivative mineral from Tom's phosphate quarry, Kapunda, South Australia**

**Peter Elliott et al.**

*Correspondence to:* Ian E. Grey ([ian.grey@csiro.au](mailto:ian.grey@csiro.au))

- [ejm-34-375-2022-supplement-title-page.pdf](#)
- [tomsquarryite.cif](#)

The copyright of individual parts of the supplement might differ from the article licence.
